# Supplementary material for: Pre-B cell to macrophage transdifferentiation without significant promoter DNA methylation changes
Source: PubMed Central journal article supplement — Nucleic Acids Res. 2011 Nov 15;40(5):1954–68. doi: 10.1093/nar/gkr1015 (PMC3299990; doi:10.1093/nar/gkr1015), 2011-11-15
Supplement: supp_gkr1015_nar-02252-v-2011-File007.pdf [file supp_gkr1015_nar-02252-v-2011-File007.pdf]

**Supplementary Figure 1. Scheme depicting the region analyzed for DNA methylation in 24 genes displaying differential methylation between HAFTL pre-B cells and RAW macrophages.** All schemes show the promoter region (from -1000 bp) and region downstream the transcription start site (indicated by an arrow). CpG sites are represented as vertical lines. The region analyzed by bisulfite sequencing is indicated by a black horizontal line.

**Supplementary Figure 2.** (A) Bisulfite genomic sequencing at the promoter of two genes without differences between B cells and macrophages (*Cebpa*, *Ebf1*) in primary cells. (B) Bisulfite genomic sequencing at the promoter of two genes with differences between B cells and macrophages (*Mmp8* and *Xdh*).

**Supplementary Figure 3. Analysis of DNA methylation changes in C/EBP $\alpha$ ER-expressing B cells after long periods following estradiol treatment.** Selected examples of bisulfite genomic sequencing at the promoter of two macrophage-specific genes and two B-cell specific genes in C10 cells at 7, 10, 15 and 30 days following estradiol treatment to induce transdifferentiation. Data obtained for HAFTL and RAW cells is also shown.

**Supplementary Figure 4. Analysis of DNA methylation changes in gene bodies during C/EBP $\alpha$ -mediated transdifferentiation.** Selected examples of bisulfite genomic sequencing at the gene bodies of two macrophage-specific (*Cebpa* and *Dock8*) and two B-cell specific (*Ebf1* and *Pax5*) genes in C10 cells. (A) The region analyzed by bisulfite sequencing is indicated by a black horizontal line under the region classified as promoter or gene body. (B) Data obtained for the C10-based system and primary cells is shown.

**Supplementary Figure 5. DNA-methylation dependence of expression of methylated genes.** The DNA methylation-dependent expression status of B-cell- and macrophage-specific genes is shown by analyzing expression following treatment of HAFTL, C10 and RAW cells with the demethylating agent 5-azadC. Data obtained at 3 and 5 days after treatment with 5  $\mu$ M 5-azadC is shown (A) Standard RT-PCR analysis (B) Quantitative RT-PCR analysis. Expression is relative to housekeeping gene *Rpl38*.

**Supplementary Figure 6.** (A) Selected macrophage-specific genes (*Itgam*, *Cebpa*, *Cebpd*) and B cell-specific genes (*Cd19*, *Lef1*, *Rag1*) from MethylCAP-chip analysis showing the M profile with respect to the TSS. (B) Heatmap and barplot representing M (log ratio raw intensities between immunoprecipitated DNA and input in MethylCAP experiments) for C10 cells at 0, 48 and 120 h after  $\beta$ -estradiol addition, as well as HAFTL pre-B cells and RAW macrophages. Normalization has done by considering these five samples (C) Plots representing M (corresponding for normalization with cell lines) versus Affymetrix expression data (Bussmann et al. 2009) for C10 at 0 h and 48 h after  $\beta$ -estradiol addition (left and center panels). The difference between two different situations:  $\text{diff}(\text{C10 48 h} - \text{C10 0 h})$  for both M and expression is also represented (right panel).

**Supplementary Figure 7. Expression changes in key B cell and macrophage-specific genes occur during transdifferentiation.** Analysis by quantitative RT-PCR of (A) four B cell-specific and (B) four macrophage-specific genes during B cell to macrophage transdifferentiation. The analysis is performed in parental HAFTL and RAW cells and C10 cells at 0 h and fully reprogrammed into functional macrophages (48 h and 120 h). Expression is relative to housekeeping gene *Rpl38*.

**Supplementary Figure 8.** Changes in the histone modification during transdifferentiation are stable even after depletion of estradiol. Pulse-induction transdifferentiation assays were performed by washing out  $\beta$ -estradiol and adding a  $\beta$ -estradiol antagonist at 48 and the histone H3 modification profile was investigated at 120 h, when the phenotype should have stabilized. Quantitative ChIP assays show no differences between standard (squares) and pulse-induction (triangles) transdifferentiation assays for the three modifications investigated (H3K9acK14ac, H3K4me3, and H3K27me3). Both macrophage-specific genes (A) and B cell-specific genes (B) are shown. HAFTL pre-B cells (H) and RAW macrophages (R) are used as controls and C10 cells at 0 h and fully reprogrammed into functional macrophages (48 h and 120 h). In all cases, data is normalized with respect to the values in HAFTL cells.

Supp. Figure 1

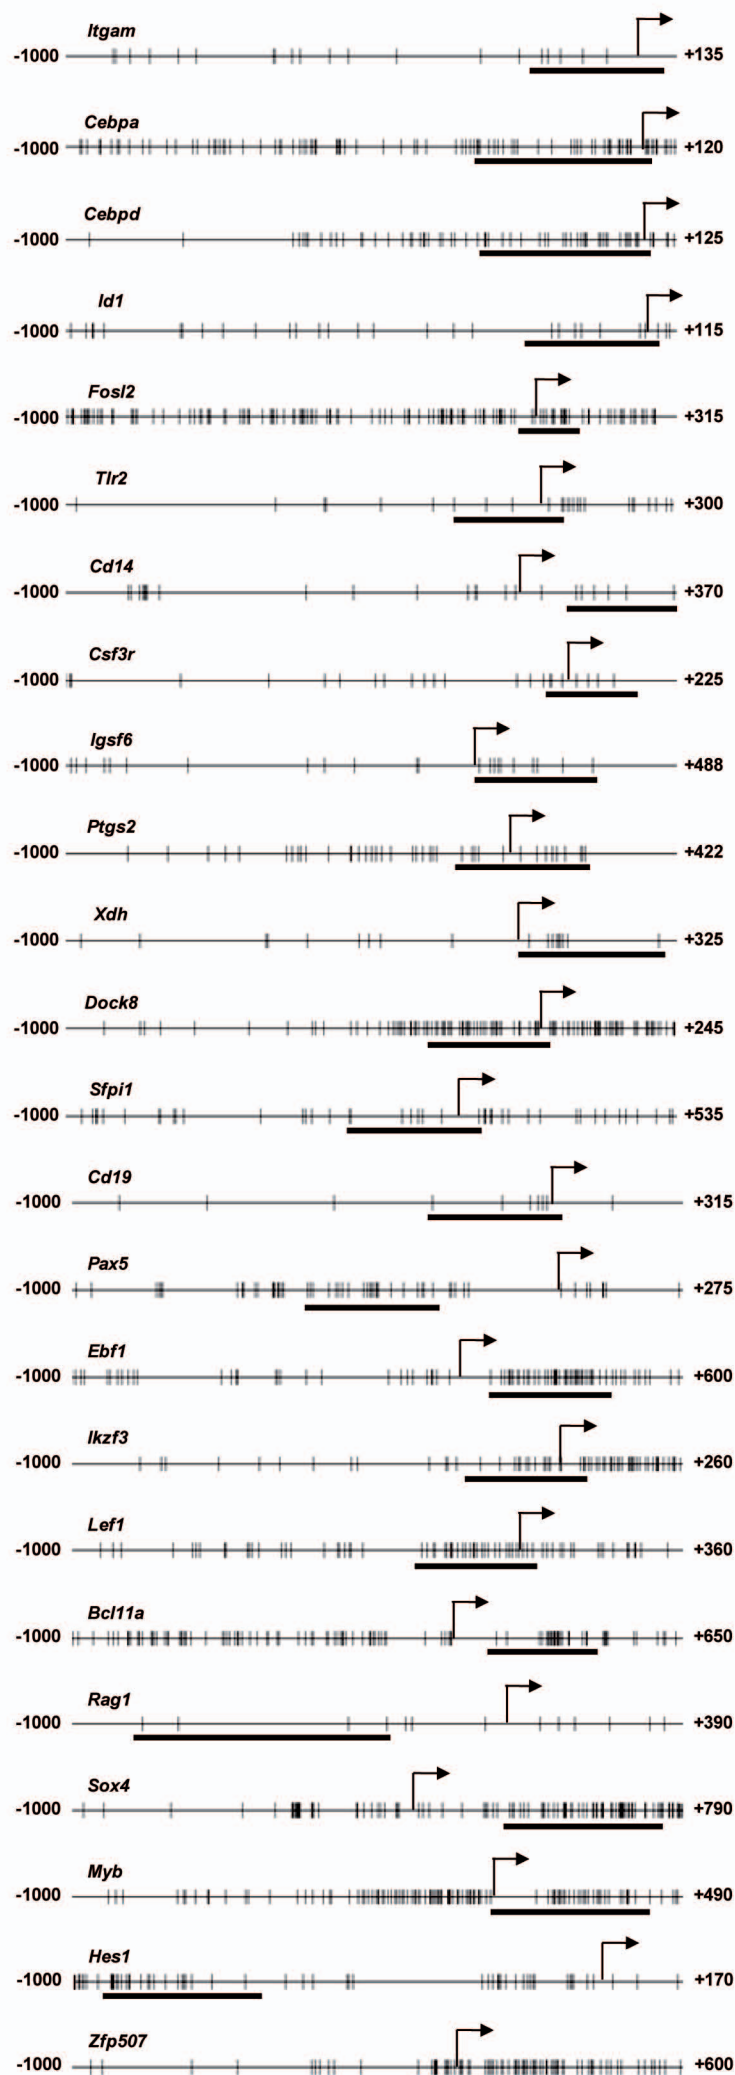

A

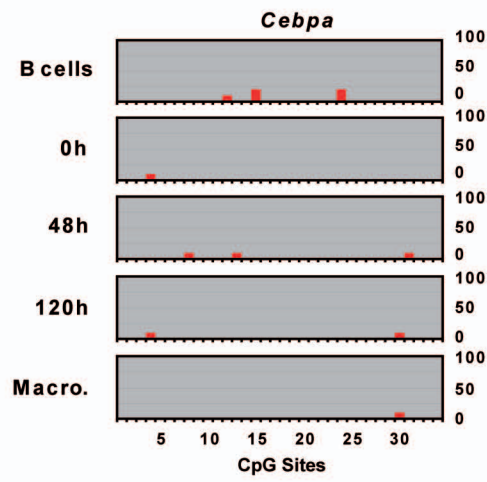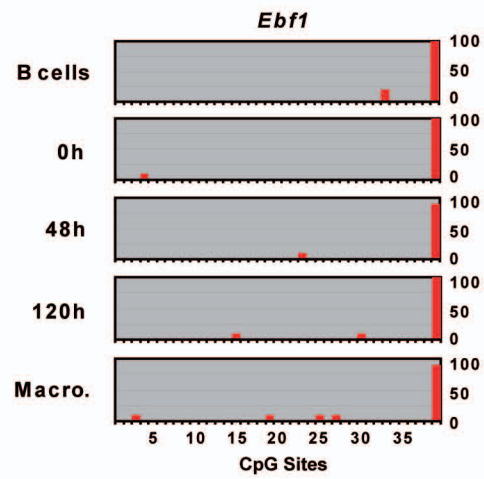

B

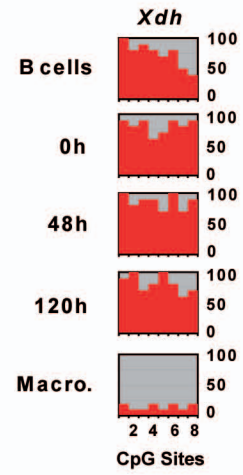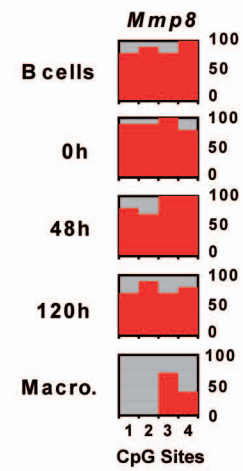

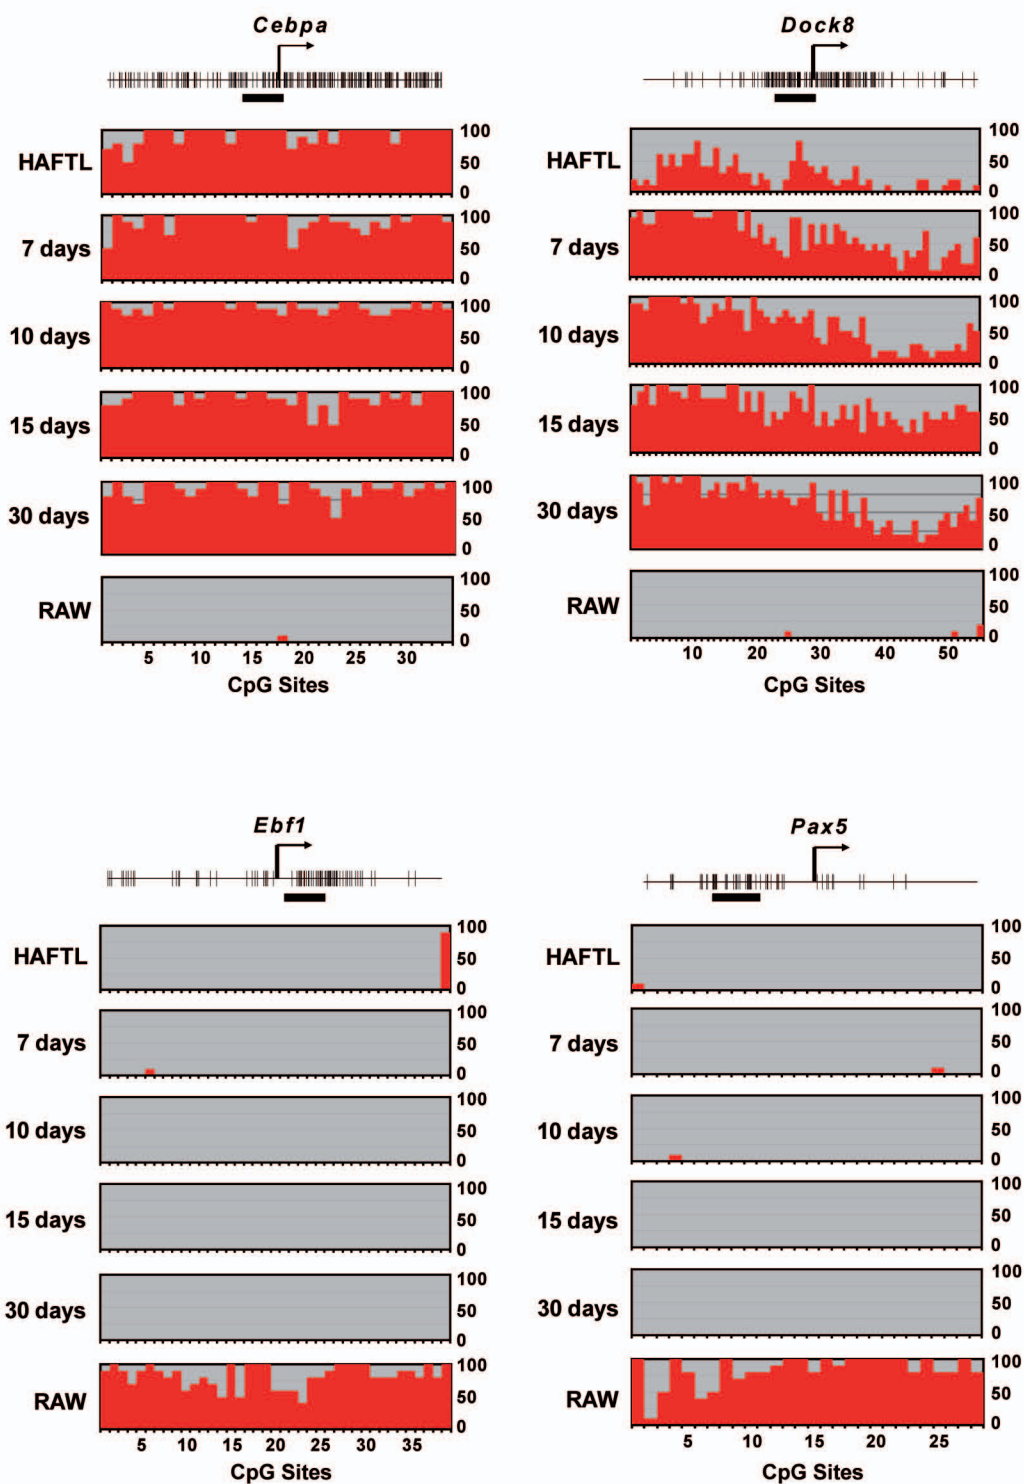

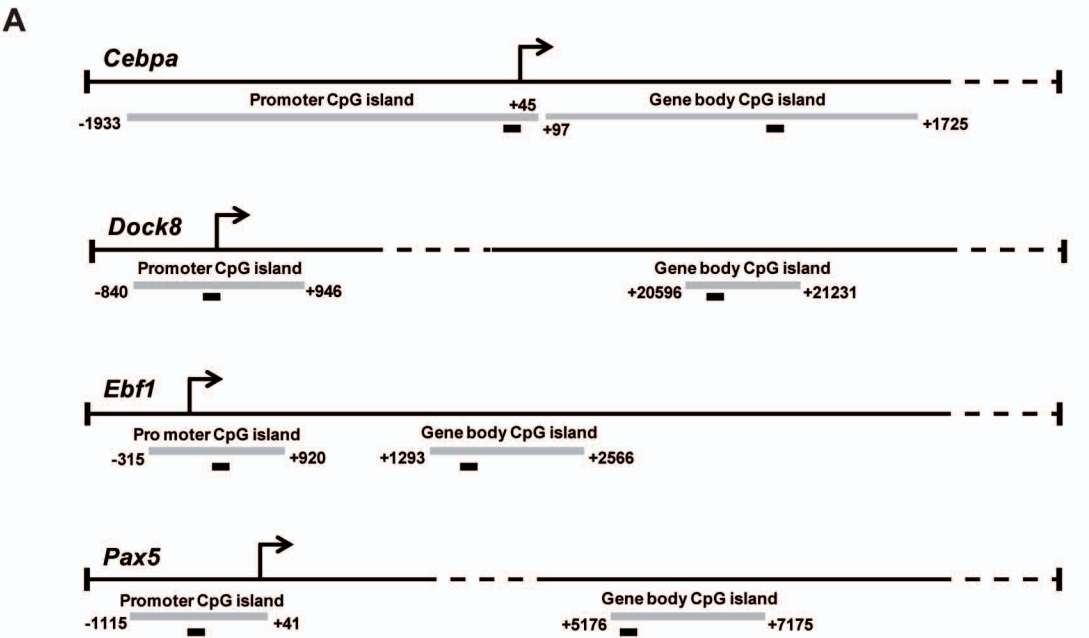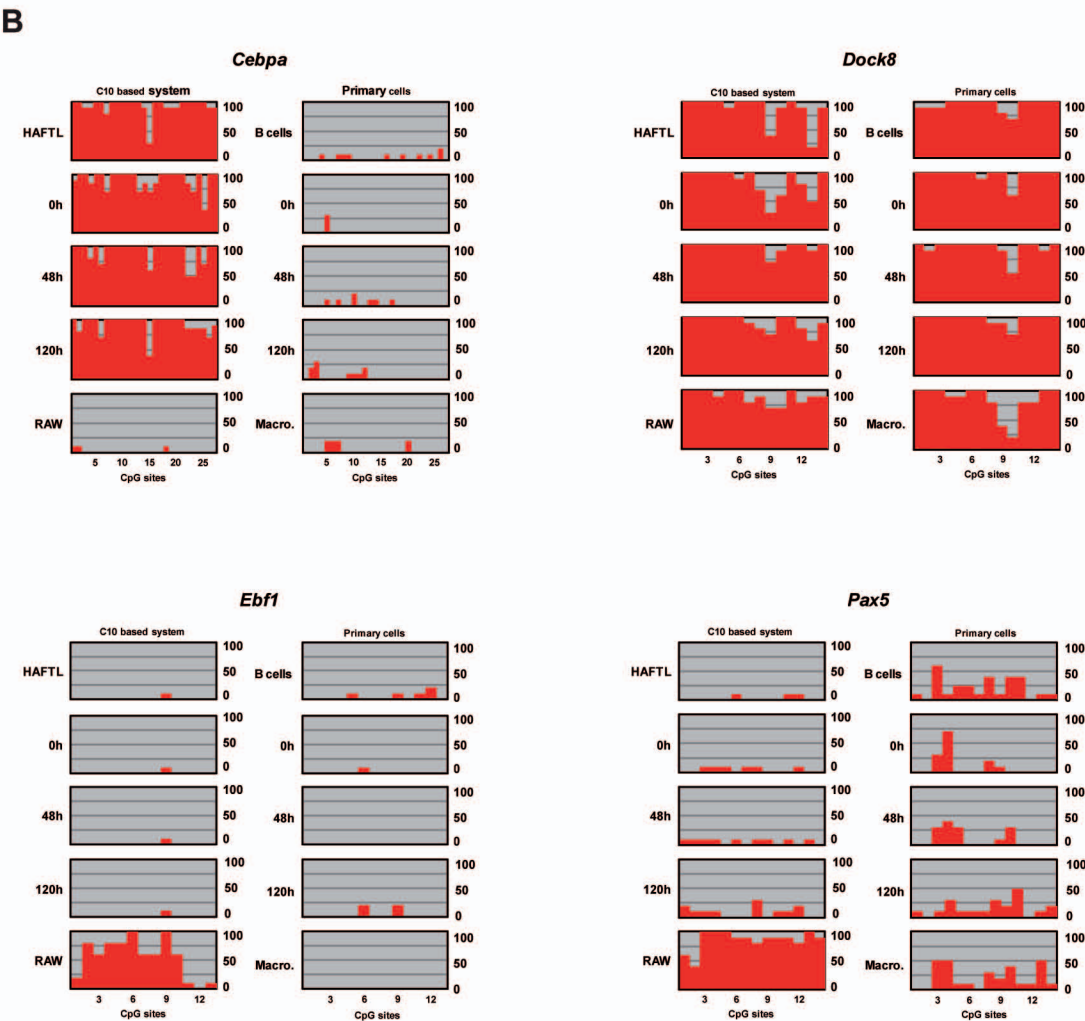

A

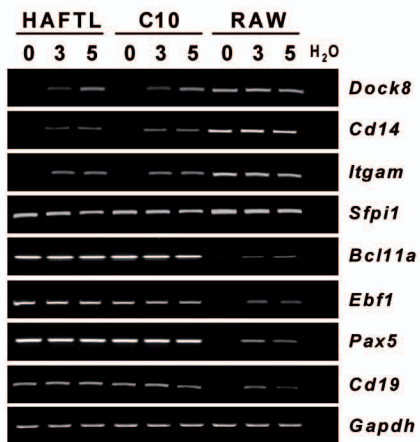

B

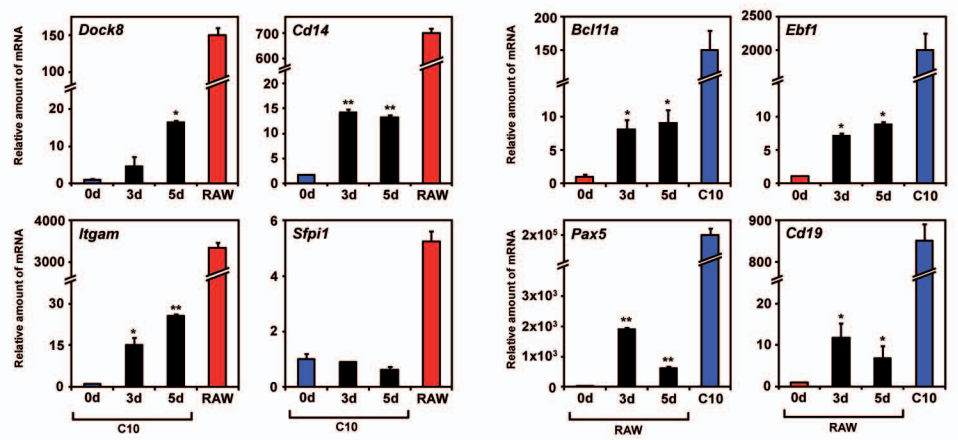

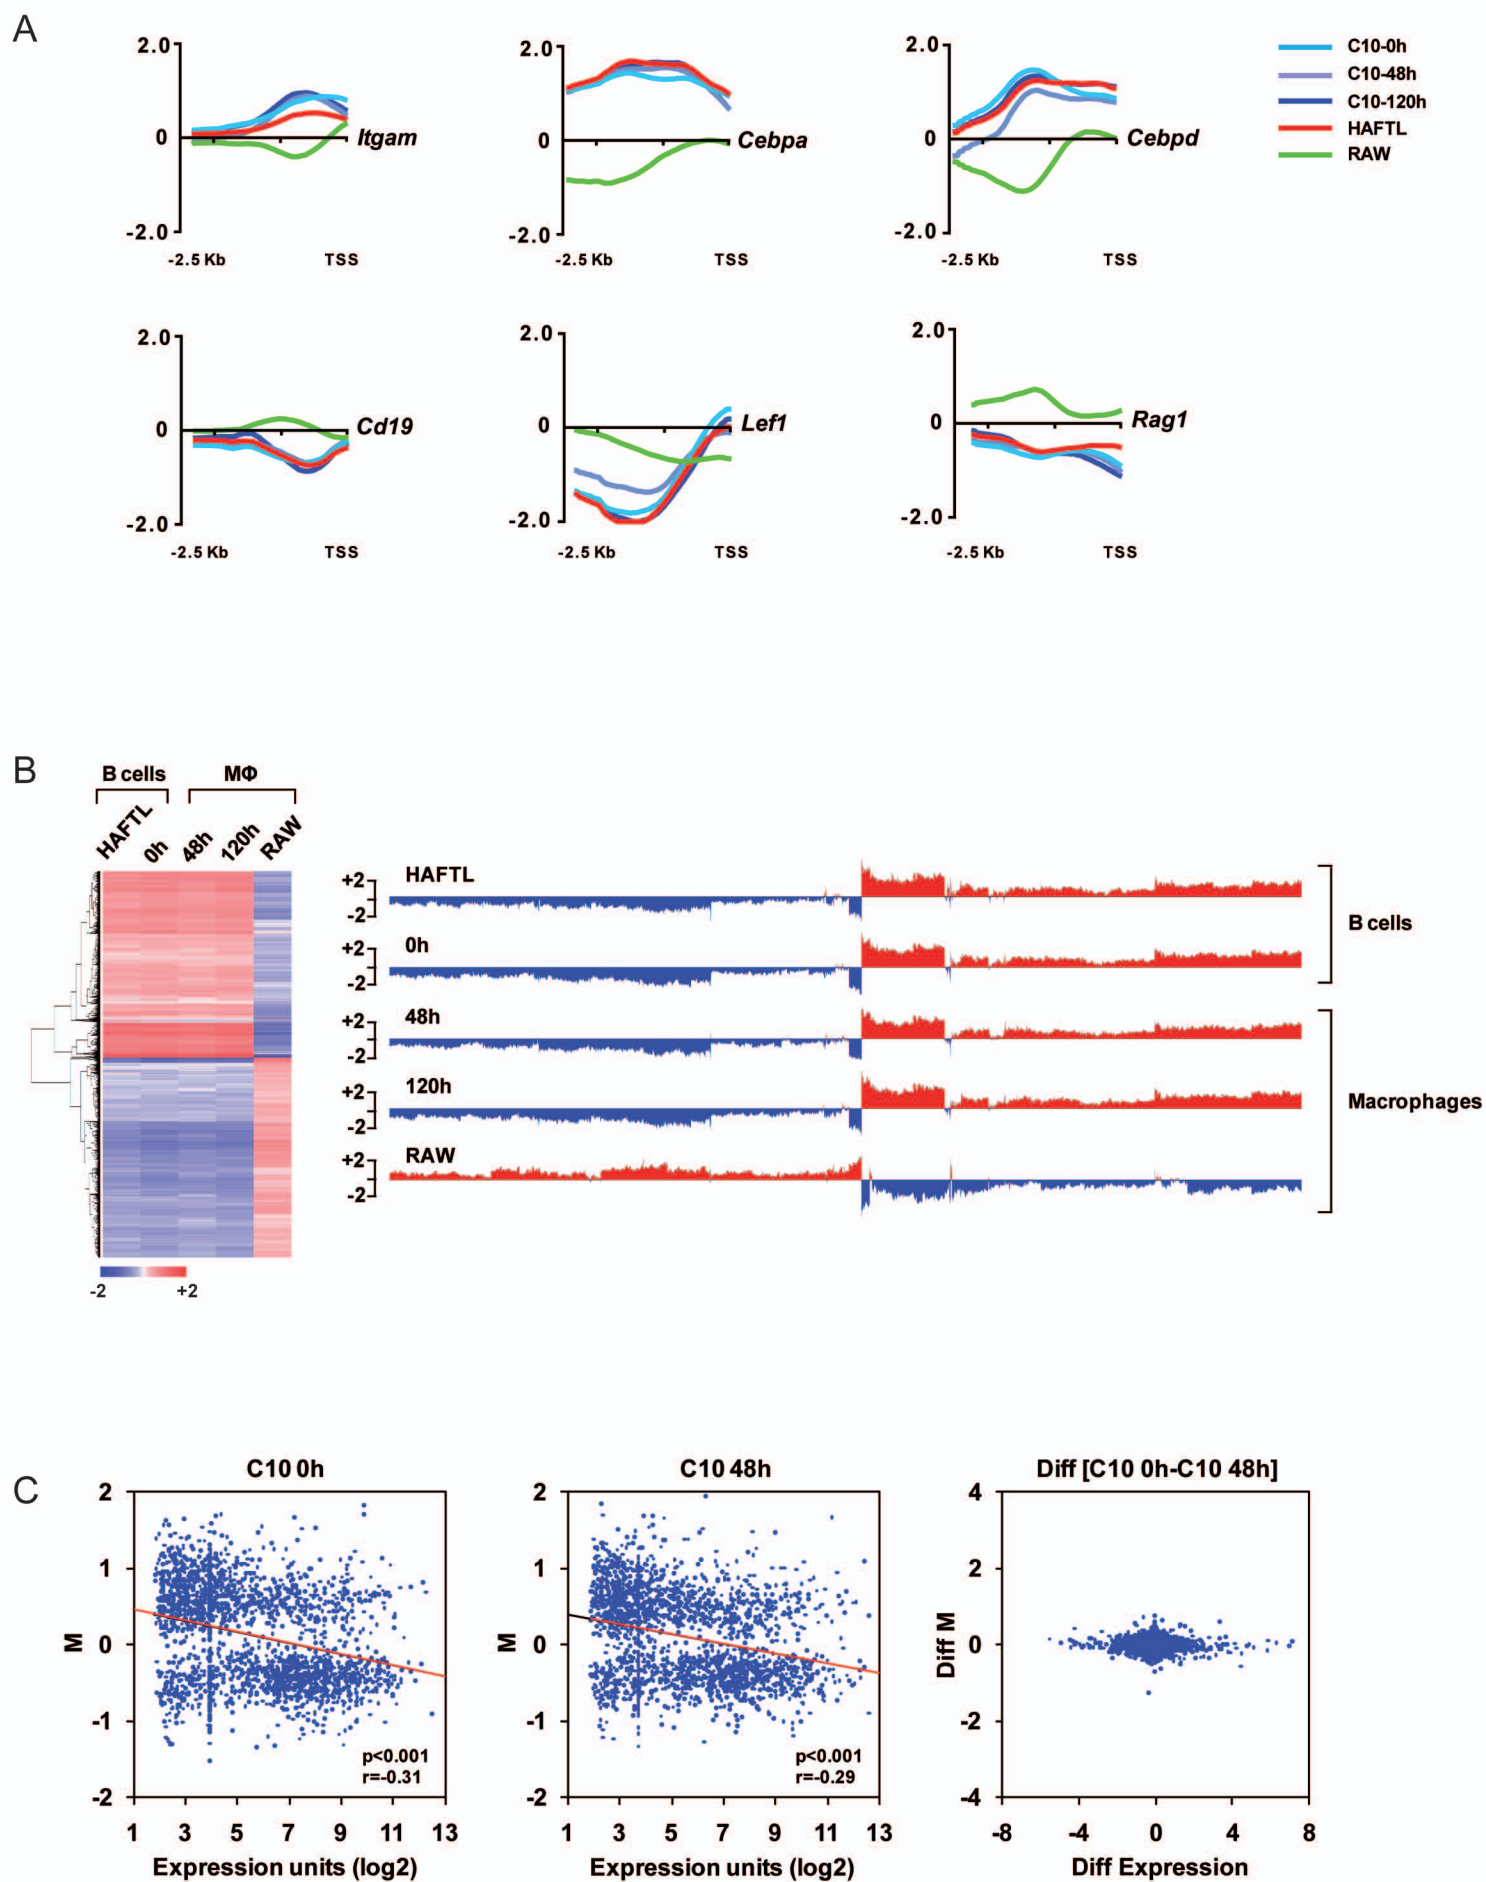

A

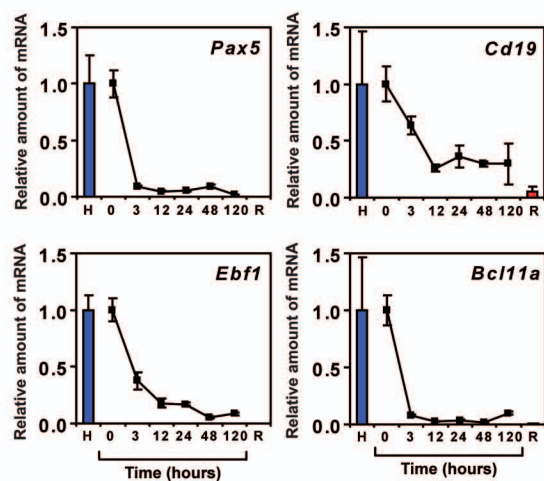

B

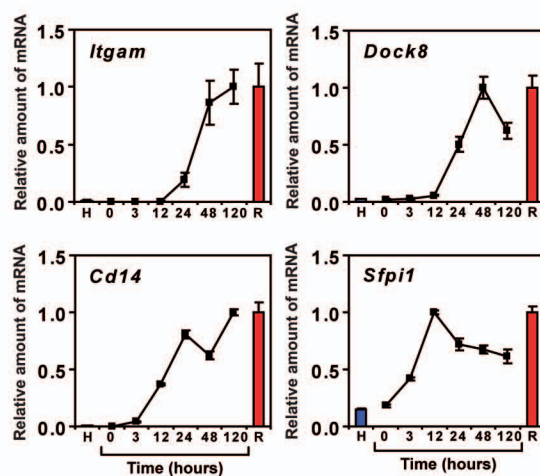

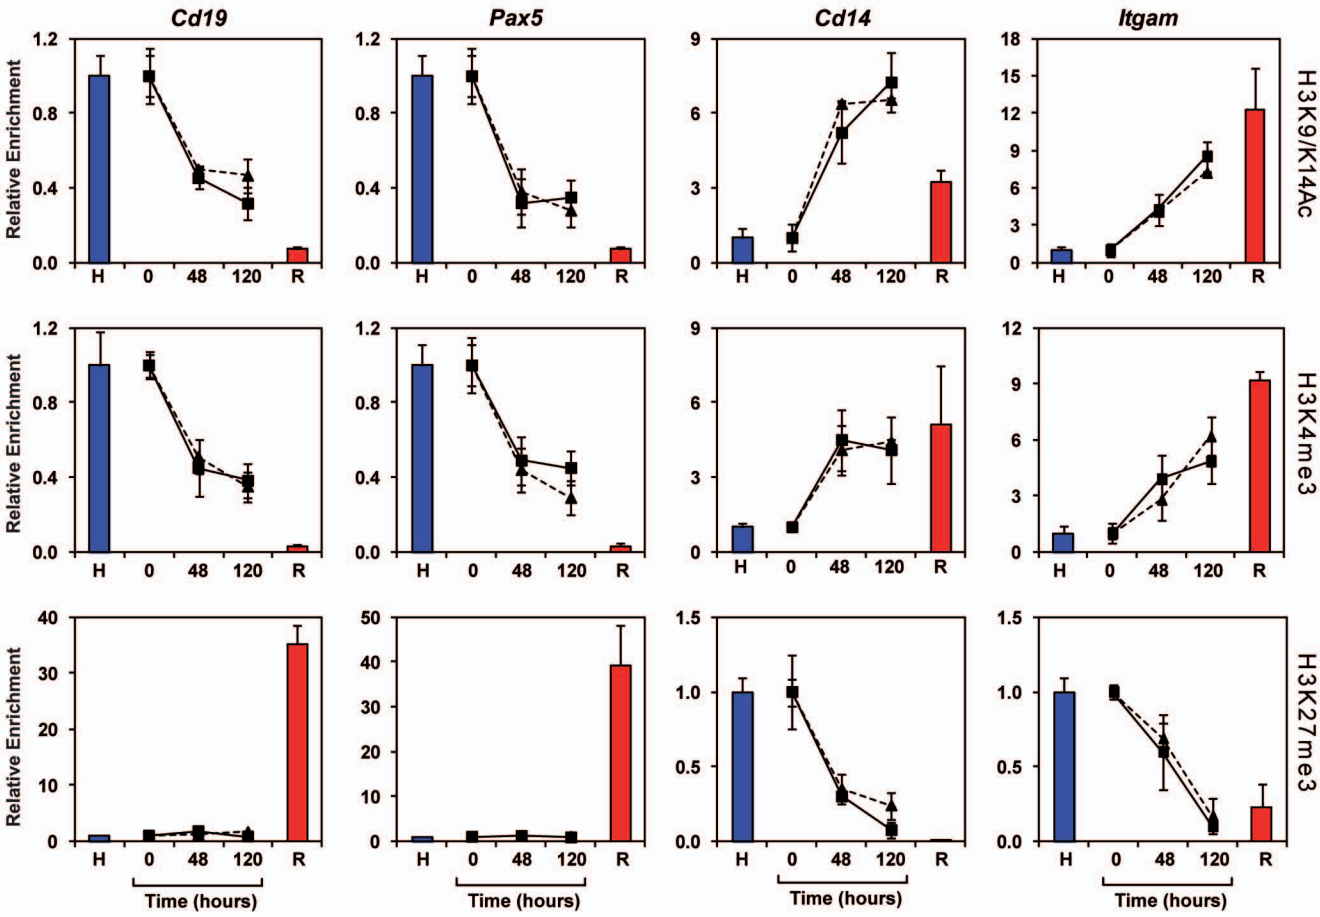

Supplementary Table 1. DNA Methylation Analysis of Macrophage and B Cell Specific Genes in HAFTL B cells, RAW264.7 macrophages, primary pre-B Cells and Bone Marrow Macrophages.

|                                          | Gene    | CpG sites | CpG Island | HAFTL         | RAW | Pre-B cells | Macrophages |
|------------------------------------------|---------|-----------|------------|---------------|-----|-------------|-------------|
| (A) Macrophage specific genes            |         |           |            | % Methylation |     |             |             |
| C/EBP family                             | Cebpa   | 34        | +          | 92            | 0   | 0           | 0           |
|                                          | Cebpb   | 39        | +          | 2             | 3   | 2           | 3           |
|                                          | Cebpd   | 30        | +          | 31            | 0   | 0           | 1           |
| Implicated in myeloid differentiation    | Sfpi1   | 8         | -          | 8             | 0   | 0           | 0           |
|                                          | Id1     | 7         | +          | 83            | 0   | 0           | 0           |
| Implicated in immune response            | Tlr2    | 4         | -          | 40            | 0   | 44          | 19          |
|                                          | Xdh     | 8         | -          | 90            | 0   | 87          | 19          |
|                                          | Ptgs2   | 29        | +          | 63            | 8   | 11          | 1           |
|                                          | Igsf6   | 10        | -          | 93            | 0   | 71          | 0           |
|                                          | Cd14    | 6         | -          | 13            | 0   | 0           | 0           |
|                                          | Itgam   | 5         | -          | 32            | 2   | 18          | 20          |
|                                          | Fosl2   | 10        | +          | 44            | 15  | 1           | 1           |
|                                          | Emb     | 20        | +          | 87            | 83  | 0           | 1           |
| Cytokine signalling                      | Csf1r   | 6         | -          | 25            | 0   | 1           | 1           |
|                                          | Csf3r   | 7         | -          | 20            | 1   | 12          | 5           |
| Other genes                              | Mmp8    | 4         | -          | 85            | 65  | 87          | 28          |
|                                          | Evi2a   | 5         | -          | 6             | 0   | 7           | 12          |
|                                          | Plaur   | 12        | +          | 2,5           | 0   | 6           | 2           |
|                                          | Dock8   | 55        | +          | 26            | 1   | 2           | 2           |
|                                          | Abhd5   | 58        | +          | 6             | 0   | 3           | 0           |
| (B) B cell specific genes                |         |           |            | % Methylation |     |             |             |
| B cell master regulators                 | Pax5    | 28        | +          | 0             | 84  | 2           | 7           |
|                                          | Ebf1    | 39        | +          | 2             | 83  | 2           | 2           |
|                                          | Tcf3    | 34        | +          | 0             | 0   | 0           | 0           |
| Regulated by Pax5                        | Ikzf3   | 15        | +          | 6             | 83  | 10          | 8           |
|                                          | Lef1    | 39        | +          | 1             | 40  | 0           | 2           |
|                                          | Irf4    | 11        | -          | 0             | 0   | 0           | 0           |
|                                          | Irf8    | 20        | +          | 13            | 18  | 1           | 2           |
| Implicated in B cell differentiation     | Foxo1   | 33        | +          | 0             | 0   | 0           | 0           |
|                                          | Sox4    | 48        | +          | 1             | 95  | 1           | 1           |
|                                          | Bcl11a  | 27        | +          | 3             | 70  | 1           | 0           |
|                                          | Myb     | 23        | +          | 0             | 84  | 0           | 0           |
|                                          | Mef2c   | 8         | -          | 100           | 100 | 91          | 98          |
| Suspected role in B cell differentiation | Aff3    | 14        | +          | 0             | 14  | 12          | 1           |
|                                          | Ets1    | 31        | +          | 0             | 0   | 0           | 0           |
|                                          | Hes1    | 22        | +          | 0             | 23  | 0           | 2           |
|                                          | Zfp507  | 46        | +          | 0             | 89  | 1           | 3           |
|                                          | Trib2   | 18        | +          | 0             | 60  | 0           | 0           |
| Implicated in B cell function            | Rag1    | 4         | -          | 0             | 67  | 21          | 8           |
|                                          | Runx3   | 8         | -          | 49            | 42  | 23          | 1           |
|                                          | Cd19    | 6         | -          | 0             | 80  | 35          | 33          |
|                                          | Cd200   | 12        | +          | 0             | 39  | 2           | 11          |
| Other genes                              | Smarca4 | 36        | +          | 0             | 0   | 0           | 0           |
|                                          | Pfn2    | 29        | +          | 14            | 44  | 4           | 8           |
|                                          | Fmr1    | 44        | +          | 2             | 2   | 1           | 0           |
|                                          | Cth     | 15        | +          | 0             | 0   | 0           | 0           |

**Supplementary Table 2. DNA Methylation Percentage of Macrophage and B Cell Specific Genes in HAFTL B Cells, C10 B Cells, Primary B Cells, C10-derived Reprogrammed Macrophages (C10-48h and C10-120h), Primary B Cells-derived Reprogrammed Macrophages (48h and 120h), RAW264.7 Macrophages and Bone Marrow Macrophages.**

|               | <b>CpG #</b> | <b>HAFTL</b> | <b>C10-0h</b> | <b>C10-48h</b> | <b>C10-120h</b> | <b>RAW</b> |
|---------------|--------------|--------------|---------------|----------------|-----------------|------------|
| <i>Itgam</i>  | 5            | 32%          | 64%           | 56%            | 48%             | 2%         |
| <i>Cebpa</i>  | 34           | 92%          | 81%           | 87%            | 80%             | 0%         |
| <i>Cebpd</i>  | 30           | 31%          | 28%           | 50%            | 40%             | 0%         |
| <i>Id1</i>    | 7            | 83%          | 78%           | 54%            | 69%             | 0%         |
| <i>Fosl2</i>  | 11           | 44%          | 43%           | 39%            | 39%             | 5%         |
| <i>Tlr2</i>   | 4            | 40%          | 23%           | 25%            | 33%             | 0%         |
| <i>Cd14</i>   | 6            | 18%          | 28%           | 22%            | 30%             | 0%         |
| <i>Csf3r</i>  | 7            | 20%          | 44%           | 46%            | 46%             | 1%         |
| <i>Igsf6</i>  | 10           | 93%          | 90%           | 83%            | 82%             | 0%         |
| <i>Ptgs2</i>  | 14           | 63%          | 79%           | 83%            | 78%             | 8%         |
| <i>Xdh</i>    | 8            | 90%          | 96%           | 76%            | 70%             | 0%         |
| <i>Dock8</i>  | 55           | 26%          | 61%           | 61%            | 54%             | 1%         |
| <i>Sfp1</i>   | 8            | 8%           | 8%            | 10%            | 8%              | 0%         |
| <i>Cd19</i>   | 6            | 0%           | 2%            | 0%             | 0%              | 80%        |
| <i>Pax5</i>   | 28           | 0%           | 0%            | 0%             | 0%              | 84%        |
| <i>Ebf1</i>   | 39           | 2%           | 3%            | 2%             | 2%              | 83%        |
| <i>Ikzf3</i>  | 15           | 6%           | 6%            | 6%             | 5%              | 83%        |
| <i>Lef1</i>   | 39           | 1%           | 3%            | 3%             | 3%              | 40%        |
| <i>Bcl11a</i> | 27           | 3%           | 0%            | 1%             | 0%              | 70%        |
| <i>Rag1</i>   | 4            | 0%           | 5%            | 0%             | 3%              | 67%        |
| <i>Sox4</i>   | 48           | 1%           | 0%            | 0%             | 0%              | 95%        |
| <i>Myb</i>    | 23           | 0%           | 0%            | 0%             | 0%              | 84%        |
| <i>Hes1</i>   | 22           | 0%           | 0%            | 0%             | 0%              | 23%        |
| <i>Zfp507</i> | 46           | 0%           | 0%            | 0%             | 0%              | 89%        |

|              | <b>CpG #</b> | <b>B Cells</b> | <b>0h</b> | <b>48h</b> | <b>120h</b> | <b>Macro</b> |
|--------------|--------------|----------------|-----------|------------|-------------|--------------|
| <i>Mmp8</i>  | 4            | 88%            | 90%       | 88%        | 78%         | 28%          |
| <i>Igsf6</i> | 10           | 71%            | 66%       | 49%        | 54%         | 0%           |
| <i>Tlr2</i>  | 4            | 44%            | 39%       | 49%        | 37%         | 19%          |
| <i>Xdh</i>   | 8            | 74%            | 81%       | 86%        | 81%         | 15%          |





































































































































































































































































|               |       |              |              |              |              |              |              |              |              |              |   |   |   |   |
|---------------|-------|--------------|--------------|--------------|--------------|--------------|--------------|--------------|--------------|--------------|---|---|---|---|
| Mrps26        | 99045 | 0,219387079  | 0,216231036  | 0,208788972  | 0,166299113  | 0,014578726  | 0,641882944  | 0,415361719  | 0,421904959  | 0,621646017  | 0 | 1 | 0 | 1 |
| Stard7        | 99138 | -0,117159677 | 0,079399557  | 0,179885129  | -0,101161232 | 0,027142455  | 0,10951749   | 0,145229834  | 0,095294674  | 0,203412393  | 0 | 0 | 0 | 0 |
| Cercam        | 99151 | 0,221060235  | 0,334878628  | 0,289681882  | 0,185755736  | 0,426127477  | 0,574322645  | 0,528349206  | 0,502503176  | 0,759634921  | 0 | 0 | 0 | 0 |
| Anapc2        | 99152 | 0,039335311  | -0,005972611 | -0,003417392 | -0,113872745 | 0,006259607  | 0,036030184  | 0,267616135  | -0,223257746 | -0,029855196 | 0 | 0 | 0 | 0 |
| Ssx2ip        | 99167 | 0,166334352  | 0,388744301  | 0,505321482  | 0,508936002  | 0,47835743   | 0,534286234  | 0,439135705  | 0,353401916  | 0,491523183  | 0 | 0 | 0 | 0 |
| 0             | 99169 | 0,707312416  | 0,819294261  | 0,71824806   | 0,940368413  | 0,948477639  | 0,9300843    | 0,918100079  | 1,126501827  | 0,814230655  | 0 | 0 | 0 | 0 |
| Tm9sf4        | 99237 | -0,563358053 | -0,827607734 | -0,716599544 | -0,712075663 | -0,481676799 | -0,472874523 | -0,664865689 | -0,483469357 | -0,429298535 | 0 | 0 | 0 | 0 |
| Cul4a         | 99375 | 0,162454828  | 0,107545815  | 0,321677791  | 0,176640594  | 0,354385835  | 0,212639805  | 0,369551164  | 0,141617216  | -0,029888768 | 0 | 0 | 0 | 0 |
| Abtb2         | 99382 | 0,271036024  | 0,273976319  | -0,022951728 | 0,207360914  | -0,366724341 | -0,52986214  | -0,421066021 | -0,448120038 | -0,321696141 | 0 | 0 | 0 | 1 |
| Golga2        | 99412 | 0,420051793  | 0,476442417  | 0,126323338  | 0,022627364  | 0,017490644  | 0,276870602  | 0,26414862   | 0,155470519  | 0,172806012  | 0 | 0 | 0 | 0 |
| Duox1         | 99439 | 0,357506775  | 0,265880686  | 0,37465807   | 0,628059481  | 0,363650646  | 0,472982672  | 0,474982778  | 0,375929877  | 0,954486462  | 1 | 0 | 0 | 1 |
| Dnrtip2       | 99480 | -0,093734431 | -0,202247796 | -0,110624462 | -0,05909799  | -0,119230864 | -0,038502373 | 0,055881077  | -0,133454985 | -0,10716606  | 0 | 0 | 0 | 0 |
| Wdr47         | 99512 | 0,134070438  | 0,109153954  | -0,161849947 | 0,140110653  | 0,201794189  | 0,345574851  | 0,13983105   | 0,411677464  | 0,209243574  | 0 | 0 | 0 | 0 |
| Fgg           | 99571 | -0,787494771 | -0,674147158 | -0,576695921 | -0,552292802 | -0,553439621 | -0,715727641 | -0,496483886 | -0,43203823  | -0,66645755  | 0 | 0 | 0 | 0 |
| Dpyd          | 99586 | 0,083882396  | 0,112596232  | 0,217570871  | 0,329772898  | -0,204206637 | -0,062799186 | 0,028663112  | -0,02117656  | 0,430614707  | 0 | 1 | 0 | 1 |
| 4933434E20Rik | 99650 | -0,491499582 | -0,396105012 | -0,516919926 | -0,636513468 | -0,357833468 | -0,538910533 | -0,400047108 | -0,26358127  | -0,415108882 | 0 | 0 | 0 | 0 |
| Eps8l3        | 99662 | -0,281458277 | -0,226777265 | -0,156182119 | -0,356662837 | 0,081008499  | 0,064533151  | 0,092391653  | 0,124420464  | -0,379630793 | 0 | 0 | 0 | 0 |
| Taf13         | 99730 | 0,238230299  | 0,292698708  | 0,247424932  | 0,261497346  | 0,32868498   | 0,282166582  | 0,540027827  | 0,317551616  | 0,255227915  | 0 | 0 | 0 | 0 |
| Tiparp        | 99929 | -0,140900067 | -0,025219678 | 0,141254768  | -0,086059851 | 0,179737499  | 0,12781647   | 0,083345217  | 0,075110729  | 0,096544925  | 0 | 0 | 0 | 0 |





































**Table S5. Primer sequences (bisulfite sequencing, RT-PCR and ChIP)**

| Gene           | Type          | Forward                    | Reverse                  | Tm (°C) |
|----------------|---------------|----------------------------|--------------------------|---------|
| <i>Cebpa</i>   | BS sequencing | TTTTTAGTGTGGTTGGAAGTG      | ACCCAATACCCCAACTAACTC    | 60      |
| <i>Cebpb</i>   | BS sequencing | GGTAGGYGGGTATATATAGGG      | CCCCAACTCTTAAAAACAAATC   | 52      |
| <i>Cebpd</i>   | BS sequencing | ATAAATAGGAAGGAGGGAAGGT     | AACTTATCCACCCTACCTAACTC  | 59      |
| <i>Sfpi1</i>   | BS sequencing | TTAGAGGGGATTGAGAAGAAAT     | TCAAACCTACCCCCTAAACTAC   | 60      |
| <i>Id1</i>     | BS sequencing | TAGTTTTTTTGTTTTTTGAGG      | CCTTCATAATCCTAAAAACAAA   | 55      |
| <i>Tlr2</i>    | BS sequencing | TTTGTGATTGGTATAGGGTTGT     | CCCCTAACCATCTAAACACC     | 59      |
| <i>Xdh</i>     | BS sequencing | GATTGGTTGTTGGTTTTTTTT      | CACATCAAAATATCCACACAAA   | 58      |
| <i>Ptgs2</i>   | BS sequencing | TATTGAAGTAGAGAGGGGAAA      | ATACACAACCAACCCACACTA    | 60      |
| <i>Igsf6</i>   | BS sequencing | TTTTTTTTTGAAGGAGAAAAAGTG   | AAAAACAACATCAACAACCAAAA  | 59      |
| <i>Cd14</i>    | BS sequencing | TATAGAGGAAGGGATAGGGTGA     | AAACAACAACAACAAACCAAC    | 60      |
| <i>Itgam</i>   | BS sequencing | ATGTGGGTGTTTTTTTGTATG      | ATTTCAAACACCACAAACACTT   | 60      |
| <i>Fosl2</i>   | BS sequencing | GTTTGTTTTGGTTAGGGGATAT     | CCRCACRTACCTACTAACC      | 60      |
| <i>Emb</i>     | BS sequencing | GAAAGAATATTTGTGGGGAGT      | CCACTACCAATCCTAAAAACAA   | 59      |
| <i>Csf3r</i>   | BS sequencing | GGAAGGGGTGTTTATGTTTT       | ACTCAACTCCTATTCCCAAAAA   | 60      |
| <i>Csf1r</i>   | BS sequencing | TTTTTTTTTGGTGTGTGGTGT      | AAAAAAACCCCAACTCCATAAC   | 61      |
| <i>Mmp8</i>    | BS sequencing | GATGTTGTGAGTTTGAGGGTAT     | TCTACATTTTCCAAAACCAAAC   | 59      |
| <i>Evi2a</i>   | BS sequencing | GAAGAGTAGAATTGAGGTGGTT     | TAAATACAAACTCAAACCTTCC   | 57      |
| <i>Plaur</i>   | BS sequencing | AGGAAGAATTATGGGATTTTT      | ATCACATATCCAATTATCATTCAA | 56      |
| <i>Dock8</i>   | BS sequencing | AAAAGAAATGTTTTAGGAATGG     | AACCTCATCTATCAACCRC      | 52      |
| <i>Abhd5</i>   | BS sequencing | TTTAGGTATTTTTGGTTGGGG      | AATAATCCTCACCTCCACC      | 60      |
| <i>Pax5</i>    | BS sequencing | AAAAAAATGGGTTTATTGGTTTT    | AACATCACAAAATATCCCCAA    | 60      |
| <i>Ebf1</i>    | BS sequencing | AAAGGGGAGGAGATTTTTTAT      | CAACTCRCTAATCTCTAACCAC   | 52      |
| <i>Tcf3</i>    | BS sequencing | TTTTGTGGGTGTTTTGGTAGT      | ACTTCTCTCAAAACAAACCCC    | 60      |
| <i>Ikzf3</i>   | BS sequencing | ATTTTTGAATGTTAAGTTTGAGGA   | AAAAAACCRCCATAAATAACTC   | 60      |
| <i>Lef1</i>    | BS sequencing | TAGGTAGTTAAGGAGAGTAGGAGG   | CTCRATCAAAACAAAAAATCTAC  | 57      |
| <i>Irf4</i>    | BS sequencing | GAGGAGTTGAAGAAAGTTAGGG     | CAAAAAATCCCAATTCAAATA    | 58      |
| <i>Irf8</i>    | BS sequencing | TATTATTGGGGGATATAAGGGA     | TAAAATCCTTTTCTCTTTACTCC  | 58      |
| <i>Foxo1</i>   | BS sequencing | TTTTTTGGGGTTTAGGATGAGT     | AACAAAACCCAAACCCTAACTC   | 61      |
| <i>Sox4</i>    | BS sequencing | TGGTTTTGTATTGTAGGAAAGG     | CCAACAAAACCTCAATATTCTC   | 58      |
| <i>Bcl11a</i>  | BS sequencing | GGATGTTAAAAGGTATTGATGA     | AAAACTTTTCCCTTTTAACTCT   | 55      |
| <i>Myb</i>     | BS sequencing | GGGGGAGTGTTAAATTTTTTT      | CTCAACCTCCCCATTACCTATA   | 59      |
| <i>Mei2c</i>   | BS sequencing | GGGGAGAGAGTAGTTTTGTGTTT    | CCCCAACACTATCTCCTCTAAA   | 60      |
| <i>Aff3</i>    | BS sequencing | TTGTTATTAGTTTGTTTGGGG      | ATATTCCACATCTACCTATCCCA  | 59      |
| <i>Ets1</i>    | BS sequencing | GTGGGATTTTGAGTTAGGTTTA     | TTAACATCTACAACCAATCACC   | 58      |
| <i>Hes1</i>    | BS sequencing | TTGGTGGAGTTTTAAAGGG        | ACCCATTCACTCTCTCTTAAA    | 58      |
| <i>Zfp507</i>  | BS sequencing | GTGGTTTGTGGTGGTTTTA        | TACACACAAAACCTAAAACTCA   | 58      |
| <i>Trib2</i>   | BS sequencing | GGGGAATTGTTGTTTAGGTTA      | ACTCCTACAATACCCCCACTAA   | 59      |
| <i>Rag1</i>    | BS sequencing | TTTGATTAGGTGGAGAGTTTTT     | TAACCAATCACAAACCAACAA    | 60      |
| <i>Runx3</i>   | BS sequencing | GTTTTTAAAGGAGGGGGAGTAT     | CTACAACAACCAATCCAAACTC   | 60      |
| <i>Cd19</i>    | BS sequencing | TGGAAAGTTTTGTGTGTAGT       | CCTCCACCAATAAAAACTTCTA   | 59      |
| <i>Cd200</i>   | BS sequencing | GAGGTTAGTGATGGGAATGTAGA    | CACCAAACTACCCATCCTTACT   | 59      |
| <i>Smarca4</i> | BS sequencing | AGGATTTTGTGTAGTTTTTGGG     | CTCCTCAAAAAACAAAAAACC    | 60      |
| <i>Pfn2</i>    | BS sequencing | GTAGTTGGTTAAGGTTTTTAAAGAGA | AAAACAATCACRACCAC        | 54      |
| <i>Fmr1</i>    | BS sequencing | TGAGGTAGGTATTTAGGAGGG      | ACAAACRCTTAAACCCA        | 53      |
| <i>Cth</i>     | BS sequencing | TAGATAAAGGGATTTTTGGGT      | TTCCATTACTCAAACCTTTATCCC | 60      |

|                           |                              |                         |                           |    |
|---------------------------|------------------------------|-------------------------|---------------------------|----|
| <i>Cebpa</i><br>Gene body | BS sequencing                | GGTGTGGAGTTGATTAGTGAT   | ATCTCAAAAAAAAAACCACCAC    | 59 |
| <i>Dock8</i><br>Gene body | BS sequencing                | TGGTTAAGGTGTGGTAAATTGT  | ACACCTTCATCCACACCTAATA    | 59 |
| <i>Ebf1</i><br>Gene body  | BS sequencing                | GTTTGGGTTGTTATTGTGGTGT  | CCCTCCAAAAAACTCCCTAAC     | 59 |
| <i>Pax5</i><br>Gene body  | BS sequencing                | TTTTGGTTAGTGTAATGTTGGG  | AAAACCATACTCTTAATCCCACA   | 59 |
|                           |                              |                         |                           |    |
|                           |                              |                         |                           |    |
| <i>Dnmt1</i>              | RT-PCR                       | CGGCTCAAAGACTTGGAAG     | TAGCCAGGTAGCCTTCCTCA      | 60 |
| <i>Dnmt3a</i>             | RT-PCR                       | CAGCCAAGAAACCCAGAAAG    | ATGCCTCCAATGAAGAGTGG      | 60 |
| <i>Dnmt3b</i>             | RT-PCR                       | AGATGATGGGAATGGCTCTG    | AGGGTACTCCTGCACATGGT      | 60 |
| <i>Aid</i>                | RT-PCR                       | AGAAAGTCACGCTGGAGACC    | GAGCAGGAGGTGGCACTATC      | 60 |
| <i>Itgam</i>              | RT-PCR                       | TGGCTTCAATCTGGACACTG    | ACACTGGTAGAGGGCACCTG      | 60 |
| <i>Cd14</i>               | RT-PCR                       | GCCTTTCTCGGAGCCTATCT    | TGGCTTCGGATCTGAGAAGT      | 60 |
| <i>Sfpi1</i>              | RT-PCR                       | TGCAAAATGGAAGGGTTTTTC   | GTGCGGAGAAATCCCAGTAG      | 60 |
| <i>Dock8</i>              | RT-PCR                       | CTTCGCGCTCAAGATCAAC     | GGCTCGACAGGCTCATAAAG      | 60 |
| <i>Cd19</i>               | RT-PCR                       | GGCTTCTACCTGTGCCAGAA    | CCCAGAGGACCTGTTCTTA       | 60 |
| <i>Pax5</i>               | RT-PCR                       | AACTTGCCCCATCAAGGTGTC   | CTGATCTCCCAGGCAAACAT      | 60 |
| <i>Ebf1</i>               | RT-PCR                       | CGGAAATCCAACCTCTTCCA    | TCTGTCCGTATCCCATTGCT      | 60 |
| <i>Bcl11a</i>             | RT-PCR                       | AAACCCCAGCACTTAAGCAA    | CATTGCATTGTTCCGTTTG       | 60 |
| <i>Pp1a</i>               | RT-PCR                       | CAAATGCTGGACCAACACAAACG | GTTTCATGCCTTCTTTCACCTTCCC | 60 |
| <i>Rpl38</i>              | RT-PCR                       | AGGATGCCAAGTCTGTCAAGA   | TCCTTGTCTGTGATAACCAGGG    | 60 |
|                           |                              |                         |                           |    |
|                           |                              |                         |                           |    |
| <i>Itgam</i>              | ChIP (histone modifications) | GAGCCTCCATGTGGGTACTG    | AGCCCTCTGTAGCCTTCCTC      | 60 |
| <i>Cd14</i>               | ChIP (histone modifications) | CTGGCACAGAATGCCCTAAT    | CCTGTCCCTTCCTCTGTGAA      | 60 |
| <i>Sfpi1</i>              | ChIP (histone modifications) | GCCCACTTGAGAAGTCTGGA    | TCAGGTGGAGGACTTTGGTC      | 60 |
| <i>Dock8</i>              | ChIP (histone modifications) | AGGTGGAAATGCGGAAGTTT    | TGATCTTGAGCGCGAAGG        | 60 |
| <i>Cd19</i>               | ChIP (histone modifications) | CCACCCCTTTCTCTATACG     | AGAGGAGATGGCATGGTAGC      | 60 |
| <i>Pax5</i>               | ChIP (histone modifications) | CCCTGTGACTCAGGTTCTCC    | AAGAACCAGGGAAAGGGTGT      | 60 |
| <i>Ebf1</i>               | ChIP (histone modifications) | CCCTCCTTGTTATCGCTCAG    | CCTGGATCCCAAACATGAAA      | 60 |
| <i>Bcl11a</i>             | ChIP (histone modifications) | GGATGTCAAAAGGCACTGATG   | CGAGAATTCCCGTTTGCTTA      | 60 |
| <i>Cebpa</i>              | ChIP (histone modifications) | GGCTGGAAGTGGGTGACTTA    | GGGGAGCATAGTGCTAGTGG      | 60 |
|                           |                              |                         |                           |    |
| <i>Itgam</i>              | ChIP (C/EBPalpha and p300)   | GAGCCTCCATGTGGGTACTG    | AGCCCTCTGTAGCCTTCCTC      | 60 |
| <i>Cd14</i>               | ChIP (C/EBPalpha and p300)   | CTGGCACAGAATGCCCTAAT    | CCTGTCCCTTCCTCTGTGAA      | 60 |
| <i>Sfpi1</i>              | ChIP (C/EBPalpha and p300)   | AGCAGCAGAAGCCTTCCAT     | GCCAGCACAAGTTCCTGATT      | 60 |
| <i>Dock8</i>              | ChIP (C/EBPalpha and p300)   | GCGCTCAAGATCAACAGGTA    | GGGCCACCTGTCTCAGAAC       | 60 |
| <i>Cd19</i>               | ChIP (C/EBPalpha and p300)   | CCACCCCTTTCTCTATACG     | AGAGGAGATGGCATGGTAGC      | 60 |
| <i>Pax5</i>               | ChIP (C/EBPalpha and p300)   | GTGGCTGAATGGGACCTAGA    | GCACAATTGTCAACCACAGG      | 60 |
| <i>Ebf1</i>               | ChIP (C/EBPalpha and p300)   | CCCTCCTTGTTATCGCTCAG    | CCTGGATCCCAAACATGAAA      | 60 |
| <i>Bcl11a</i>             | ChIP (C/EBPalpha and p300)   | CTGACTGCTCAGAGGTGGAC    | GGATCTGAGCGACCCTACAA      | 60 |
| <i>Cebpa</i>              | ChIP (C/EBPalpha and p300)   | GGCTGGAAGTGGGTGACTTA    | GGGGAGCATAGTGCTAGTGG      | 60 |
